# Supplementary material
Source: PubMed Central journal article supplement (PMC5853445)

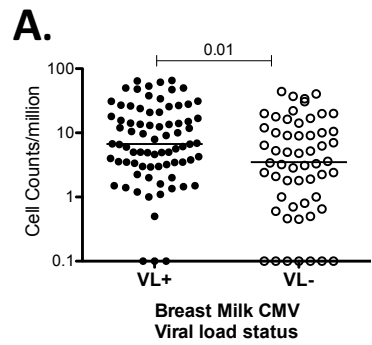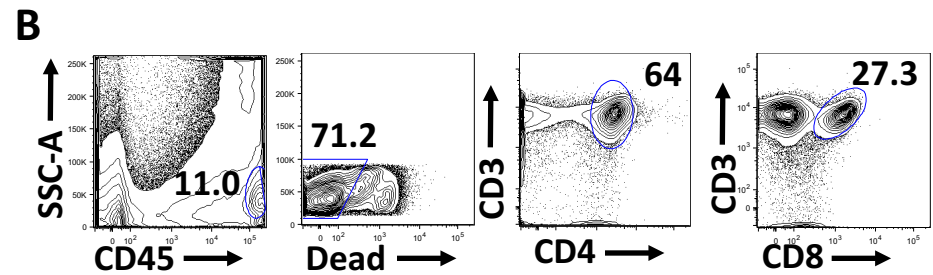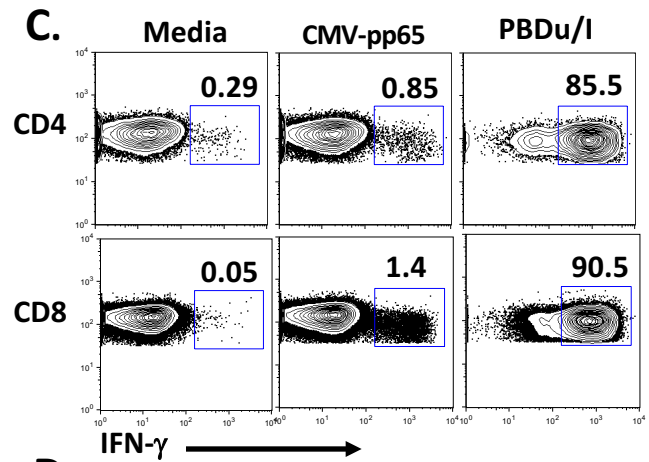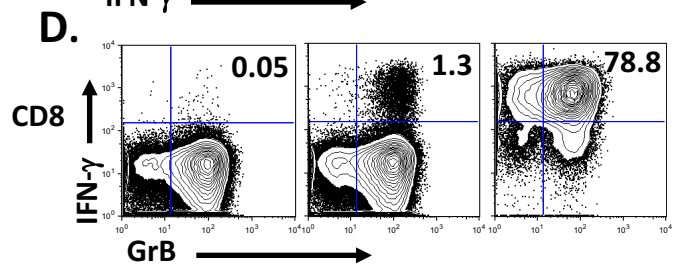

Supplement: jix457_suppl_supplementary_figure.pdf [file jix457_suppl_supplementary_figure.pdf]
